# Supplementary material for: The abundance of homoeologue transcripts is disrupted by hybridization and is partially restored by genome doubling in synthetic hexaploid wheat
Source: BMC Genomics. 2017 Feb 10;18:149. doi: 10.1186/s12864-017-3558-0 (PMC5303294; doi:10.1186/s12864-017-3558-0)
Supplement: Additional file 7: — Dataset S6. List of differentially expressed homoeologs between S1 and F1 in AS2255 × AS60. (XLSX 45 kb) [file 12864_2017_3558_MOESM7_ESM.xlsx]

## Sheet: A homoeologous
Dataset S6. List of differentially expressed A-homoeologs between S1 and F1 in AS2255 × AS60a
Gene ID	FPKM for F1	FPKM for S1	FDR	log2(S1/F1)	Regulated	Classical of gene type	Best rice homologous gene	Description
Traes_1AL_BB4298457	9.65461	1.2707	0.000314356	-2.73819	down	dupletAB92	LOC_Os05g50340.1	MYB family transcription factor, putative, expressed
Traes_7AL_7A572FF1F	1.25903	0.332151	0.0284349	-1.72956	down	dupletAB323	LOC_Os07g13140.1	retrotransposon protein, putative, unclassified, expressed
Traes_2AL_B05A4E316	1.10987	0.0369893	0.0003623	-4.71097	down	dupletAB479	LOC_Os01g55750.3	TCP family transcription factor, putative, expressed
Traes_4AS_7DC625FF5	8.27646	1.34602	0.000148458	-2.42966	down	dupletAB932	LOC_Os04g44150.1	gibberellin 2-beta-dioxygenase 7, putative, expressed
Traes_3AS_4DF357170	35.8983	11.0886	0.0222057	-1.49666	down	dupletAB977	LOC_Os01g09640.1	Myb transcription factor, putative, expressed
Traes_6AL_BDABFD3D9	8.30537	1.96967	0.0078066	-1.87637	down	dupletAD3541	LOC_Os06g30400.1	expressed protein
Traes_6AS_F1CEB89EE	21.9418	5.93824	0.00521572	-1.6858	down	dupletAD4313	LOC_Os02g16680.1	bZIP transcription factor domain containing protein,
Traes_6AL_168121E7E	1.44151	0.157157	0.000181711	-3.00302	down	dupletAD4841	LOC_Os02g46460.1	peptide transporter PTR2, putative, expressed
Traes_4AS_6C0AB5E18	34.0981	2.943	0.0025149	-3.33434	down	dupletAD5331	LOC_Os03g12890.2	aminotransferase domain containing protein, putative,
Traes_2AL_C7E806D1A	334.746	87.1538	0.0142064	-1.74539	down	singletonA1024	LOC_Os04g55710.1	transposon protein, putative, unclassified, expressed
Traes_6AS_B2526D636	9.31598	2.7475	0.0141156	-1.56654	down	singletonA10657	LOC_Os11g25454.1	cytokinin-N-glucosyltransferase 1, putative, expressed
Traes_4AL_D7CEEBE8C	1.14508	0.26426	0.0229608	-1.9235	down	singletonA12486	LOC_Os06g05160.1	sulfate transporter, putative, expressed
Traes_2AL_454BAD62F	394.322	75.5518	0.000437293	-2.19168	down	singletonA13515	LOC_Os04g55710.1	transposon protein, putative, unclassified, expressed
Traes_4AL_FE0C5AEF4	1169.91	36.0907	0.00707472	-4.81682	down	singletonA14174	LOC_Os02g01590.1	glycosyl hydrolases, putative, expressed
Traes_5AL_922FE5C43	48.8639	5.91554	8.4551e-07	-2.85415	down	singletonA1601	LOC_Os03g27120.1	ICE-like protease p20 domain containing protein, putative,
Traes_5AL_8D5A83BF8	26.5564	3.0951	2.02968e-08	-2.91094	down	singletonA1736	LOC_Os03g27120.1	ICE-like protease p20 domain containing protein, putative,
Traes_6AS_FDF16F4EA	11.9241	3.67384	0.0270765	-1.50305	down	singletonA4741	LOC_Os02g03960.1	CPuORF1 - conserved peptide uORF-containing transcript,
Traes_2AL_3F5788C72	108.82	25.2912	0.00870422	-1.91241	down	singletonA4790	LOC_Os04g55710.1	transposon protein, putative, unclassified, expressed
Traes_6AL_2B4A305CD	3.22081	0.669759	0.000620831	-2.07342	down	triplet1932	LOC_Os02g45520.1	uncharacterized membrane protein, putative, expressed
Traes_1AL_1D8244B27	8.91295	1.97043	0.000636538	-1.98011	down	triplet383	LOC_Os05g39770.1	aminotransferase, putative, expressed
Traes_6AS_B28F01D5E	1.43695	0.370943	0.0313332	-1.75676	down	triplet3925	LOC_Os02g01100.2	transmembrane amino acid transporter protein, putative,
Traes_4AS_C2B77F64F	8.07878	2.24845	0.00765724	-1.65409	down	triplet4839	LOC_Os03g07570.4	aminotransferase, putative, expressed
Traes_2AS_992E876B0	3.53396	0.467006	0.0313332	-2.73409	down	triplet5499	LOC_Os07g34110.1	integral membrane protein DUF6 containing protein,
Traes_7AS_30F35F888	5.71026	0.879171	0.00106069	-2.5094	down	triplet6175	LOC_Os06g13210.1	peptide transporter PTR2, putative, expressed
Traes_4AL_0BBAFF5C6	41.8991	11.4844	0.0275442	-1.66829	down
Traes_3AS_DD21AD44C	35.6673	10.9503	0.0227981	-1.50779	down
Traes_7AS_0DFB95F18	0.144843	2.00333	0.000149939	3.97862	up	dupletAB162	LOC_Os08g28860.1	hydrolase, NUDIX family, domain containing protein,
Traes_1AL_0F39673AF1	432.843	1712.8	0.000437293	2.17606	up	dupletAB756	LOC_Os09g17740.1	chlorophyll A-B binding protein, putative, expressed
Traes_1AL_6E5BA9C6F	31.6953	219.003	0.000916913	2.97598	up	dupletAB944	LOC_Os01g41710.1	chlorophyll A-B binding protein, putative, expressed
Traes_1AL_762DB7548	0.590692	4.06106	0.000120135	2.97114	up	dupletAB1406	LOC_Os05g44140.1	non-symbiotic hemoglobin 2, putative, expressed
Traes_2AL_800303D8D	0.802155	5.03949	0.000118735	2.828	up	dupletAB1916	LOC_Os03g18850.1	pathogenesis-related Bet v I family protein, putative,
Traes_4AL_47F0C2746	2.11607	11.6073	0.0387055	2.64564	up	dupletAB2048	LOC_Os01g56050.1	MATE efflux family protein, putative, expressed
Traes_6AS_58D403D66	5.49616	25.2789	0.000118735	2.38859	up	dupletAD2763	LOC_Os01g41710.1	chlorophyll A-B binding protein, putative, expressed
Traes_6AS_F8D06BEC8	14.3565	134.602	0.00106069	3.40787	up	dupletAD3186	LOC_Os01g41710.1	chlorophyll A-B binding protein, putative, expressed
Traes_5AL_CE646C4CA	2.69948	11.3193	0.000126373	2.25767	up	dupletAD3473	LOC_Os10g28370.1	chlorophyllase-2, chloroplast precursor, putative,
Traes_7AL_F70DA9639	0.743082	4.00402	0.0288017	2.6067	up	dupletAD4011	LOC_Os06g28194.1	expressed protein
Traes_2AL_E917722EE	2.5891	6.99775	0.043274	1.63066	up	dupletAD4338	LOC_Os12g02310.2	LTPL11 - Protease inhibitor/seed storage/LTP family protein
Traes_4AS_068F25CBE	25.168	68.842	0.0165383	1.64047	up	dupletAD5023	LOC_Os07g02460.1	expressed protein
Traes_6AL_EE6043DF0	0.174588	1.91611	0.00420544	3.62754	up	dupletAD5197	LOC_Os02g42430.1	GEM, putative, expressed
Traes_2AS_1F35CBAEE	23.2709	81.7538	0.003341	2.00112	up	singletonA10328	LOC_Os12g19381.1	ribulose bisphosphate carboxylase small chain, chloroplast
Traes_7AS_FE2971684	0.905899	3.39517	0.000660511	2.11285	up	singletonA10717	LOC_Os06g08154.1	receptor-like protein kinase 5 precursor, putative,
Traes_2AS_57126A6E5	0.255249	1.06964	0.00949281	2.24414	up	singletonA11028	LOC_Os04g05050.1	pectate lyase precursor, putative, expressed
Traes_7AL_F9127BBC5	1.10564	6.57931	1.41611e-07	2.77093	up	singletonA11473	LOC_Os02g34790.1	receptor-like protein kinase 5 precursor, putative, expressed
Traes_4AL_AA83843E9	2.69021	12.1528	0.000304479	2.3595	up	singletonA11587	LOC_Os11g20090.1	O-methyltransferase, putative, expressed
Traes_2AS_7425ED39F	89.4399	255.828	0.04362	1.7068	up	singletonA13725	LOC_Os12g17600.1	ribulose bisphosphate carboxylase small chain, chloroplast
Traes_4AL_EE0AD342B	2.12745	6.35583	0.0142595	1.76723	up	singletonA14337	LOC_Os06g05120.2	expressed protein
Traes_6AS_B5351634D1	0.0583355	8.41095	0.00120844	7.35289	up	singletonA14392	LOC_Os09g17740.1	chlorophyll A-B binding protein, putative, expressed
Traes_2AL_898D652B9	3.56369	18.2198	7.63919e-05	2.52892	up	singletonA1543	LOC_Os03g18850.1	pathogenesis-related Bet v I family protein, putative,
Traes_1AS_A12B2DC63	2.12115	7.59519	0.0204867	2.02981	up	singletonA2241	LOC_Os05g05680.1	1-aminocyclopropane-1-carboxylate oxidase, putative,
Traes_1AS_581D331E0	0.0542906	1.0187	0.00579625	4.43689	up	singletonA2482	LOC_Os01g02800.1	receptor-like kinase ARK1AS, putative, expressed
Traes_3AS_5C3DB2EF8	0.744132	3.72882	0.0222075	2.51527	up	singletonA3253	LOC_Os01g06140.1	expressed protein
Traes_5AL_9BB3D36D2	13.5471	74.9815	0.0153012	2.66068	up	singletonA4029	LOC_Os01g41710.1	chlorophyll A-B binding protein, putative, expressed
Traes_4AL_BDC0356FF	0.089324	6.54881	0.0183324	6.36057	up	singletonA5072	LOC_Os05g10330.1	HAD superfamily phosphatase, putative, expressed
Traes_1AL_ED8C9876C	2.52709	8.72686	0.0353672	2.00949	up	singletonA6840	LOC_Os11g37950.1	WIP3 - Wound-induced protein precursor, expressed
Traes_1AL_E96C0662D	0.495577	5.48524	1.18357e-09	3.68692	up	singletonA7197	LOC_Os10g39680.1	CHIT14 - Chitinase family protein precursor, expressed
Traes_6AS_E5254BC5B	19.5505	129.928	6.94126e-07	2.91689	up	singletonA7426	LOC_Os01g41710.1	chlorophyll A-B binding protein, putative, expressed
Traes_5AL_16F3640B6	57.5884	214.177	0.00106069	2.08974	up	singletonA784	LOC_Os09g17740.1	chlorophyll A-B binding protein, putative, expressed
Traes_5AS_23EA62AFA	38.0405	182.811	2.16075e-06	2.45929	up	singletonA8739	LOC_Os11g47970.1	AAA-type ATPase family protein, putative, expressed
Traes_2AL_8CBEE2F6B	5.35272	20.8203	0.000265492	2.14313	up	singletonA8829	LOC_Os04g54320.1	expressed protein
Traes_3AS_E0768C642	1.33897	6.41781	0.0243076	2.44424	up	singletonA9119	LOC_Os01g06140.1	expressed protein
Traes_7AL_61D317A85	1.04997	3.80085	0.0376398	2.06748	up	singletonA9743	LOC_Os10g28080.1	glycosyl hydrolase, putative, expressed
Traes_7AL_772A49098	0.396957	1.6912	0.00128997	2.28304	up	triplet2266	LOC_Os08g34790.1	AMP-binding domain containing protein, expressed
Traes_4AL_F86AA1EB8	2.60518	7.10406	0.0113019	1.64031	up	triplet3125	LOC_Os03g48010.1	exostosin, putative, expressed
Traes_2AS_18956EE53	0.389984	2.08053	0.00164657	2.59983	up	triplet3178	LOC_Os04g05050.1	pectate lyase precursor, putative, expressed
Traes_2AL_1AE31EB64	0.0395857	2.8904	3.53322e-05	6.38979	up	triplet3542	LOC_Os11g37950.1	WIP3 - Wound-induced protein precursor, expressed
Traes_5AL_099F2FB96	0.366401	1.13302	0.0350615	1.83306	up	triplet3826	LOC_Os03g02670.2	transporter family protein, putative, expressed
Traes_1AL_4B7636BC9	4.63886	12.6545	0.010715	1.64124	up	triplet4180	LOC_Os08g06280.7	LSD1 zinc finger domain containing protein, expressed
Traes_3AL_B0A5AA3FD	0.0201348	2.89936	0.000352026	7.37694	up	triplet602	LOC_Os01g72370.2	helix-loop-helix DNA-binding domain containing protein,
Traes_1AS_A3DCEEB591	5.10132	16.5153	0.0180956	1.88805	up	triplet6049	LOC_Os05g08420.1	expressed protein
Traes_7AS_D2C7C1F43	23.9684	91.2047	0.0165915	2.12088	up	triplet6158	LOC_Os01g41710.1	chlorophyll A-B binding protein, putative, expressed
Traes_1AL_B77FFBAFC	32.6783	275.158	1.73825e-05	3.25981	up	triplet6729	LOC_Os01g41710.1	chlorophyll A-B binding protein, putative, expressed
Traes_1AL_04C9CFE29	6.58649	22.8934	0.00160839	1.97508	up
Traes_1AL_13E5810F4	12.3012	33.4212	0.0107391	1.6342	up
aSignificance by Benjamini-Hchberg multiple test correction (P < 0.05)

## Sheet: B homoeologous
List of differentially expressed B-homoeologs between S1 and F1 in AS2255 × AS60a
Gene ID	FPKM for F1	FPKM for S1	FDR	log2(S1/F1)	Regulated	Classical of gene type	Best rice homologous gene	Description
Traes_1BL_02D833114	2.02379	0.228712	0.000314356	-2.95063	down	dupletAB381	LOC_Os02g41460.1	DUF640 domain containing protein, putative, expressed
Traes_4BL_63EFE8C91	11.1938	2.41268	0.00127127	-2.02259	down	dupletAB932	LOC_Os04g44150.1	gibberellin 2-beta-dioxygenase 7, putative, expressed
Traes_3B_B45238368	14.0148	3.42294	0.00261169	-1.83715	down	dupletAB977	LOC_Os01g09640.1	Myb transcription factor, putative, expressed
Traes_3B_96CE67D2D	2.0899	0.404796	0.00700493	-2.17222	down	dupletAB1141	LOC_Os01g11810.2	powdery mildew resistant protein 5, putative, expressed
Traes_3B_CE6BA8E33	142.291	32.1874	0.00267009	-1.95	down	dupletAB2069	LOC_Os01g07590.1	universal stress protein domain containing protein,
Traes_3B_C0D770CC5	8.05219	2.25399	0.0148552	-1.63944	down	dupletAB2126	LOC_Os01g06500.2	PHLOEM 2-LIKE A5, putative, expressed
Traes_5BL_7CE3EDE29	7.9486	0.552359	0.0211492	-3.66186	down	dupletBD6120	LOC_Os09g23300.1	integral membrane protein, putative, expressed
Traes_5BL_EFE5243F4	499.601	44.7811	0.018922	-3.29459	down	dupletBD7418	LOC_Os03g54130.1	cysteine protease 1 precursor, putative, expressed
Traes_2BL_F43F59BFF	1.44434	0.15228	0.0137613	-3.05688	down	singletonB16408	LOC_Os04g39980.1	gibberellin 20 oxidase 2, putative, expressed
Traes_3B_4780B18F6	1.75224	0.0130857	0.0024474	-6.8843	down	singletonB16722	LOC_Os01g58910.1	auxin-induced protein 5NG4, putative, expressed
Traes_3B_1B6B31737	19.1573	2.73112	1.99574e-05	-2.62161	down	singletonB18134	LOC_Os01g12520.1	mitochondrial carrier protein, putative, expressed
Traes_2BS_2DB805014	28.5716	6.6405	0.00521572	-1.9121	down	singletonB20036	LOC_Os11g24070.1	LTPL10 - Protease inhibitor/seed storage/LTP family protein
Traes_3B_FC3A4318D	13.8567	3.27874	0.00762458	-1.88608	down	singletonB20126	LOC_Os01g66010.1	amino acid transporter, putative, expressed
Traes_3B_D825EC594	7.63376	1.17416	6.66614e-05	-2.50974	down	singletonB20168	LOC_Os01g12520.1	mitochondrial carrier protein, putative, expressed
Traes_3B_212B21131	11.7846	3.87452	0.0467207	-1.4077	down	singletonB23472	LOC_Os05g35140.1	nodulin MtN3 family protein, putative, expressed
Traes_3B_8655FEE7C	74.0085	16.3119	0.00103049	-1.98885	down	singletonB23805
Traes_5BL_D863D0729	24.3476	5.82267	0.038852	-1.87154	down	singletonB25339	LOC_Os02g35970.1	BTBN2 - Bric-a-Brac, Tramtrack, Broad Complex BTB domain
Traes_2BL_0D44F4C96	48.4423	12.9954	0.0133404	-1.70531	down	singletonB27765	LOC_Os04g55710.1	transposon protein, putative, unclassified, expressed
Traes_2BS_CB79BAFB1	248.089	61.9063	0.0255606	-1.81342	down	singletonB27770	LOC_Os03g19427.1	nicotianamine synthase, putative, expressed
Traes_5BL_EC24EEA67	6.41971	0.962122	2.56578e-05	-2.54041	down	singletonB28065	LOC_Os09g07460.1	kelch repeat protein, putative, expressed
Traes_2BL_BDC074418	21.5729	6.02006	0.0147874	-1.64632	down	singletonB29288	LOC_Os04g55710.1	transposon protein, putative, unclassified, expressed
Traes_2BL_1C31451BE	116.013	9.16098	0.0336529	-3.4621	down	singletonB31771	LOC_Os04g40630.1	BTBZ4 - Bric-a-Brac, Tramtrack, Broad Complex BTB domain
Traes_3B_C7311D239	1.73415	0.35358	0.0133404	-2.1022	down	singletonB32088	LOC_Os03g04530.1	cytochrome P450, putative, expressed
Traes_3B_58717295D	26.1687	5.2821	0.000708795	-2.11413	down	triplet2206	LOC_Os05g32320.1	integral membrane transporter family protein, putative,
Traes_4BS_FE55994BB	21.961	5.66777	0.00404539	-1.76248	down	triplet2767	LOC_Os03g27210.1	LOL3, putative, expressed
Traes_1BL_C6ACA137C	22.7415	4.69851	0.000482944	-2.08248	down	triplet383	LOC_Os05g39770.1	aminotransferase, putative, expressed
Traes_1BL_26BC686B8	1.47435	0.305838	0.0195109	-2.08053	down	triplet4059	LOC_Os05g48230.1	expressed protein
Traes_2BL_5880DAAC3	1.21	0.0136644	2.25503e-07	-6.2701	down	triplet4165	LOC_Os04g43200.1	caleosin related protein, putative, expressed
Traes_3B_A4134C5CB	4.49687	1.26265	0.0404974	-1.63413	down	triplet4467	LOC_Os01g03110.1	expressed protein
Traes_2BS_EA4D55C79	28.2435	6.24275	0.00106069	-1.9827	down	triplet4597	LOC_Os07g47450.1	flowering promoting factor-like 1, putative, expressed
Traes_4BL_7F6FBA917	43.4942	14.1134	0.0387055	-1.43459	down	triplet4814	LOC_Os03g49830.1	expressed protein
Traes_7BS_E13DA5B31	5.15562	0.628891	0.000982974	-2.8394	down	triplet6175	LOC_Os06g13210.1	peptide transporter PTR2, putative, expressed
Traes_2BL_0CC943834	1.88341	0.328009	0.0117427	-2.32265	down	triplet7781	LOC_Os07g05380.1	ATPase BadF/BadG/BcrA/BcrD type, putative, expressed
Traes_3B_FCF176308	6.58734	1.07968	0.00115473	-2.41566	down
Traes_4BL_F51BD6B41	8.56916	0.884683	0.008347	-3.07671	down
Traes_3B_A5EEE27621	54.4591	13.2464	0.0011081	-1.84974	down
Traes_1BL_02BC24D8A	2.59103	7.89426	0.0281256	1.80233	up	dupletAB281	LOC_Os10g32830.1	kinase, pfkB family, putative, expressed
Traes_1BL_E38BBC0DA1	33.9561	150.3	0.000349331	2.33315	up	dupletAB944	LOC_Os01g41710.1	chlorophyll A-B binding protein, putative, expressed
Traes_3B_2A12B8F93	0.0233111	3.73634	1.00856e-09	7.48695	up	dupletAB1204	LOC_Os01g72370.2	helix-loop-helix DNA-binding domain containing protein,
Traes_2BL_19C5224BE	0.463088	2.89085	0.00294523	2.83418	up	dupletAB1916	LOC_Os03g18850.1	pathogenesis-related Bet v I family protein, putative,
Traes_1BS_B8CD783A1	1.27884	4.14205	0.0191064	1.87	up	dupletAB1957	LOC_Os04g25980.1	cytokinin-O-glucosyltransferase 2, putative, expressed
Traes_2BL_DD37344C5	16.159	47.0492	0.0101708	1.73706	up	dupletAB2297	LOC_Os04g50970.1	seed specific protein Bn15D1B, putative, expressed
Traes_2BL_281306FE9	0.206473	10.4187	0.0132625	5.833	up	dupletBD7005	LOC_Os04g37760.1	expressed protein
Traes_5BS_33597360E	1.12105	4.06926	0.0255606	2.05805	up	dupletBD7557	LOC_Os03g22200.1	nodulin MtN3 family protein, putative, expressed
Traes_1BL_6CCAC095C	2.03748	19.196	1.9541e-06	3.41328	up	dupletBD7760	LOC_Os09g17740.1	chlorophyll A-B binding protein, putative, expressed
Traes_5BL_CC5BEE88D	30.6144	95.1765	0.0124063	1.81728	up	dupletBD7948	LOC_Os09g36930.1	aquaporin protein, putative, expressed
Traes_2BS_A70DA4BBF	1.37938	4.40486	0.00110768	1.86795	up	dupletBD8232	LOC_Os02g01100.2	transmembrane amino acid transporter protein, putative,
Traes_4BS_A9BBB237B	0.289056	1.86697	0.000916913	2.8937	up	singletonB14903	LOC_Os11g03240.1	MATE efflux family protein, putative, expressed
Traes_7BL_8C6B85F0D1	3.1772	9.22841	0.0313332	1.72341	up	singletonB15846	LOC_Os02g48870.1	aspartic proteinase nepenthesin-2 precursor, putative,
Traes_4BL_0174177391	5.73759	19.4689	0.018253	1.94942	up	singletonB16248	LOC_Os06g45640.1	core histone H2A/H2B/H3/H4, putative, expressed
Traes_1BS_749C5715D	0.244867	1.29977	0.0396364	2.58928	up	singletonB16972	LOC_Os01g02810.1	resistance-related receptor-like kinase, putative,
Traes_3B_73957187E	609.124	1579.52	0.00608587	1.56752	up	singletonB17209	LOC_Os01g45274.4	carbonic anhydrase, chloroplast precursor, putative,
Traes_5BL_60D1A74BA	0	6.44071	0.00360612	Inf	up	singletonB19047	LOC_Os05g49840.1	phospholipase, putative, expressed
Traes_3B_9D5A9FBFD	30.0965	82.5162	0.028422	1.65265	up	singletonB19660	LOC_Os02g12550.1	cytochrome P450, putative, expressed
Traes_1BS_FBB6C5A981	1.33726	6.27234	0.000583598	2.43879	up	singletonB21228	LOC_Os01g02800.1	receptor-like kinase ARK1AS, putative, expressed
Traes_1BL_0D5375344	65.808	209.585	0.00440445	1.8566	up	singletonB21702	LOC_Os09g17740.1	chlorophyll A-B binding protein, putative, expressed
Traes_4BL_C30ADD398	2.17709	6.10414	0.043274	1.68273	up	singletonB21755	LOC_Os03g20640.1	expressed protein
Traes_2BL_B657F7F3A	0.383123	2.46283	0.00115473	2.87664	up	singletonB21903	LOC_Os03g18850.1	pathogenesis-related Bet v I family protein, putative,
Traes_1BL_7B735AEE6	0.186217	1.22907	0.003341	2.93594	up	singletonB22064	LOC_Os01g47900.1	S-locus-like receptor protein kinase, putative, expressed
Traes_2BL_1D11DA71A	0.564974	3.24436	0.000904186	2.70524	up	singletonB22633	LOC_Os03g18850.1	pathogenesis-related Bet v I family protein, putative,
Traes_2BS_8F766B5E9	0.239936	1.6008	0.000898364	2.94484	up	singletonB23439	LOC_Os07g48030.1	peroxidase precursor, putative, expressed
Traes_2BS_23E094F33	443.034	1130.93	0.0478585	1.54506	up	singletonB23556	LOC_Os12g19381.1	ribulose bisphosphate carboxylase small chain, chloroplast
Traes_4BL_3CB730359	0.205474	1.68813	0.000679077	3.22272	up	singletonB23658	LOC_Os02g52840.1	flavonol synthase/flavanone 3-hydroxylase, putative,
Traes_1BS_5093FE126	0.371795	1.49342	0.027245	2.2007	up	singletonB23811	LOC_Os01g02800.1	receptor-like kinase ARK1AS, putative, expressed
Traes_6BS_3343D8C16	16.0122	41.2917	0.018928	1.56023	up	singletonB24285	LOC_Os01g41710.1	chlorophyll A-B binding protein, putative, expressed
Traes_2BL_E3222439E	13.4173	40.217	0.0039285	1.78195	up	singletonB25417	LOC_Os04g51300.1	peroxidase precursor, putative, expressed
Traes_4BL_78D895AE8	2.75715	9.36548	0.0249154	1.95779	up	singletonB25594	LOC_Os03g09020.1	dehydrogenase, putative, expressed
Traes_2BS_FEF4BCA61	0.501555	1.56166	0.0376398	1.8212	up	singletonB25829	LOC_Os11g35580.1	disease resistance protein RPM1, putative, expressed
Traes_1BL_E7A59AA9C	87.0285	367.477	7.63919e-05	2.27075	up	singletonB26554	LOC_Os09g17740.1	chlorophyll A-B binding protein, putative, expressed
Traes_5BL_6FB7A4B58	45.0528	363.338	0.0409314	3.19555	up	singletonB27210	LOC_Os01g41710.1	chlorophyll A-B binding protein, putative, expressed
Traes_5BL_E5DAD6335	0.294765	1.08923	0.0403701	2.07452	up	singletonB27504	LOC_Os05g51420.2	hypersensitive-induced response protein, putative,
Traes_2BS_0AF61748C	163.848	609.48	0.00130384	2.08675	up	singletonB27524	LOC_Os12g19381.1	ribulose bisphosphate carboxylase small chain, chloroplast
Traes_3B_189FA2C94	1.53639	13.623	5.91611e-07	3.33668	up	singletonB27637	LOC_Os03g37640.1	MATE efflux family protein, putative, expressed
Traes_1BS_EF41B9A31	5.74502	19.0283	0.00142825	1.91987	up	singletonB27869	LOC_Os01g02800.1	receptor-like kinase ARK1AS, putative, expressed
Traes_6BS_1BE03792C	16.5895	57.9838	0.000482944	1.99799	up	singletonB28346	LOC_Os09g17740.1	chlorophyll A-B binding protein, putative, expressed
Traes_6BS_34C603530	88.7334	494.488	1.25177e-05	2.66458	up	singletonB28433	LOC_Os01g41710.1	chlorophyll A-B binding protein, putative, expressed
Traes_5BL_2C06592B7	10.749	91.9974	3.92756e-09	3.28417	up	singletonB29892	LOC_Os01g41710.1	chlorophyll A-B binding protein, putative, expressed
Traes_4BL_09186DE10	1.19193	5.30474	0.0195109	2.35067	up	singletonB31076	LOC_Os03g03034.1	flavonol synthase/flavanone 3-hydroxylase, putative,
Traes_5BL_5081CE9EC	31.725	238.776	9.33701e-07	3.09758	up	triplet1034	LOC_Os01g41710.1	chlorophyll A-B binding protein, putative, expressed
Traes_4BL_4E616F36A	8.58965	22.8592	0.0311182	1.60573	up	triplet1707	LOC_Os03g14040.1	expressed protein
Traes_4BS_28D2F8459	1.98743	5.01625	0.0355919	1.52315	up	triplet1722	LOC_Os03g46440.1	BTBA4 - Bric-a-Brac,Tramtrack, Broad Complex BTB domain
Traes_6BS_4EA352A7A	0.801914	2.85053	0.0044281	2.039	up	triplet1834	LOC_Os02g12790.1	GATA zinc finger domain containing protein, expressed
Traes_7BL_0CD3BD38C	0.983872	3.42061	0.00654523	1.98966	up	triplet2266	LOC_Os08g34790.1	AMP-binding domain containing protein, expressed
Traes_6BL_22DCB4C2A	8.73084	20.5663	0.0302078	1.43611	up	triplet4744	LOC_Os02g57670.1	ribosomal L9, putative, expressed
Traes_5BL_51C846D76	0.861102	2.47763	0.0241556	1.72374	up	triplet5077	LOC_Os05g51420.1	hypersensitive-induced response protein, putative,
Traes_3B_FAAFF83D5	0.0198204	2.79116	0.0010107	7.3447	up	triplet602	LOC_Os01g72370.2	helix-loop-helix DNA-binding domain containing protein,
Traes_7BS_474D2C23F	9.5879	22.4513	0.0350671	1.43129	up	triplet6554	LOC_Os06g09679.2	chaperonin, putative, expressed
Traes_1BL_D2EDF576B	61.9737	222.278	0.00325188	2.03328	up	triplet6729	LOC_Os01g41710.1	chlorophyll A-B binding protein, putative, expressed
Traes_3B_EC4C29900	14.9695	41.1774	0.0128612	1.6468	up	triplet7318	LOC_Os01g59090.1	thylakoid lumenal 20 kDa protein, putative, expressed
Traes_1BL_519D11755	16.2964	41.7128	0.0211492	1.55226	up	triplet7512	LOC_Os05g38680.1	plant-specific domain TIGR01589 family protein, expressed
Traes_5BL_16DA2DF8A	0.383555	1.45451	0.0176963	2.10648	up
aSignificance by Benjamini-Hchberg multiple test correction (P < 0.05)

## Sheet: D homoeologous
List of differentially expressed D-homoeologs between S1 and F1 in AS2255 × AS60a
Gene ID	FPKM for F1	FPKM for S1	FDR	log2(S1/F1)	Regulated	Classical of gene type	Best rice homologous gene	Description
Traes_3DL_92D59112E	7.22601	1.32571	0.000376076	-2.24766	down	dupletAD2474	LOC_Os05g35140.1	nodulin MtN3 family protein, putative, expressed
Traes_6DS_972C7F490	4.68585	0.734523	1.28844e-05	-2.4843	down	dupletAD2538	LOC_Os02g02320.1	OsSCP6 - Putative Serine Carboxypeptidase homologue,
Traes_2DL_4FAEAF8AA	156.185	43.1855	0.00949281	-1.65924	down	dupletAD3881	LOC_Os04g55710.1	transposon protein, putative, unclassified, expressed
Traes_4DL_FA5E12311	2.00502	0.483692	0.0265063	-1.86141	down	dupletAD3950	LOC_Os01g08020.1	boron transporter protein, putative, expressed
Traes_4DL_D96E9236F	1.33879	0.108411	0.00448189	-3.43779	down	dupletAD4078	LOC_Os03g08470.1	AP2 domain containing protein, expressed
Traes_7DS_E373FDD65	548.656	11.2704	0.00190572	-5.40354	down	dupletAD4406	LOC_Os02g01590.1	glycosyl hydrolases, putative, expressed
Traes_6DL_0A59B823C	5.85297	1.1094	0.000185632	-2.20273	down	dupletAD4841	LOC_Os02g46460.1	peptide transporter PTR2, putative, expressed
Traes_4DL_9D7A18BBC	35.2476	2.78797	7.63919e-05	-3.46253	down	dupletAD5331	LOC_Os03g12890.2	aminotransferase domain containing protein, putative,
Traes_4DL_A4D4A24AF	5.28309	1.46516	0.0168338	-1.66014	down	dupletAD5460	LOC_Os03g09850.1	auxin-responsive protein-related, putative, expressed
Traes_5DL_B3D04CE3D	13.1309	3.80991	0.00986558	-1.59525	down	dupletBD7404	LOC_Os01g37910.1	vacuolar-processing enzyme precursor, putative, expressed
Traes_5DL_4FAF0F3C2	899.474	122.78	6.34728e-05	-2.68421	down	dupletBD7418	LOC_Os03g54130.1	cysteine protease 1 precursor, putative, expressed
Traes_4DL_3C29B5BE0	7.6889	1.84459	0.0304291	-1.86315	down	dupletBD8076	LOC_Os07g47450.1	flowering promoting factor-like 1, putative, expressed
Traes_5DL_F5AE83831	1.50552	0.263534	0.00411207	-2.31491	down	singletonD32174	LOC_Os01g56360.1	wax synthase, putative, expressed
Traes_7DL_8B9E4EDE0	13.0488	2.97081	0.000916913	-1.94014	down	singletonD32746	LOC_Os06g44840.1	prenyltransferase, putative, expressed
Traes_3DS_7D2CF1105	18.3057	5.48997	0.0475009	-1.5475	down	singletonD32834	LOC_Os01g06500.2	PHLOEM 2-LIKE A5, putative, expressed
Traes_2DS_FE40FC64C	173.566	45.6142	0.00855241	-1.73796	down	singletonD33145	LOC_Os03g19427.1	nicotianamine synthase, putative, expressed
Traes_7DL_55AC0BE09	6.5373	1.31081	0.000482944	-2.12528	down	singletonD34276	LOC_Os06g39230.1	aldehyde dehydrogenase, putative, expressed
Traes_2DS_496E54902	10.1445	1.6558	0.0101708	-2.42284	down	singletonD36187	LOC_Os02g36940.1	uncharacterized Cys-rich domain containing protein,
Traes_3DL_8404269F8	2.29694	0.130793	0.0389497	-3.93218	down	singletonD36483	LOC_Os01g73670.1	expressed protein
Traes_6DL_0CA95BBB9	3.01282	0.730915	0.0364692	-1.85403	down	singletonD38131	LOC_Os06g36180.1	amino acid transporter, putative, expressed
Traes_2DL_C72357F81	3.4269	0.101898	4.38172e-05	-4.87051	down	singletonD39793	LOC_Os09g08072.1	glycosyl hydrolases, putative, expressed
Traes_2DL_957ED041B	70.9906	17.9244	0.0113019	-1.79196	down	singletonD40071	LOC_Os04g55710.1	transposon protein, putative, unclassified, expressed
Traes_3DS_963B4F8EA	3.06311	0.168369	0.0103054	-4.00275	down	singletonD40841	LOC_Os12g13030.1	osFTL7 FT-Like7 homologous to Flowering Locus T gene;
Traes_7DL_F7060F6A1	1.26986	0.229655	0.00548286	-2.26734	down	singletonD43095	LOC_Os06g49220.1	peptide transporter, putative, expressed
Traes_2DL_BB8131ECB	10.7344	1.32014	0.0386769	-2.82201	down	singletonD43444	LOC_Os09g08072.1	glycosyl hydrolases, putative, expressed
Traes_4DL_19620E86D	1.60361	0.0580357	0.00303129	-4.58597	down	singletonD44899	LOC_Os05g44260.1	DUF584 domain containing protein, putative, expressed
Traes_7DS_E34DA2F50	307.624	7.21751	0.00136776	-5.21223	down	singletonD46988	LOC_Os02g01590.1	glycosyl hydrolases, putative, expressed
Traes_5DL_26F3B188A	25.6382	6.56138	0.00511403	-1.76847	down	triplet1668	LOC_Os09g26420.4	AP2 domain containing protein, expressed
Traes_6DL_20A343A96	9.15376	2.3318	0.00384675	-1.77616	down	triplet1932	LOC_Os02g45520.1	uncharacterized membrane protein, putative, expressed
Traes_3DS_90057C657	18.508	3.54279	0.00137207	-2.19387	down	triplet2206	LOC_Os05g32320.1	integral membrane transporter family protein, putative,
Traes_1DL_A890AB24C	2.00379	0.399075	0.00324747	-2.13884	down	triplet383	LOC_Os05g39770.1	aminotransferase, putative, expressed
Traes_1DL_83E665871	13.7213	3.90498	0.0426927	-1.62012	down	triplet5428	LOC_Os05g41460.1	cysteine proteinase inhibitor precursor protein, putative,
Traes_1DS_5F13D45E6	7.62218	1.46771	0.00321982	-2.18081	down
Traes_2DS_2A2A2C715	7.99578	1.95396	0.0320328	-1.83219	down
Traes_7DS_12A052839	0.0363186	2.26699	0.0396364	6.13443	up	dupletAD2421	LOC_Os11g03290.1	nucleoside-triphosphatase, putative, expressed
Traes_2DL_AFBB29E25	20.9498	53.8986	0.0147874	1.55689	up	dupletAD2718	LOC_Os04g51300.1	peroxidase precursor, putative, expressed
Traes_6DS_51B66DB37	17.1886	110.794	8.4551e-07	2.87051	up	dupletAD2763	LOC_Os01g41710.1	chlorophyll A-B binding protein, putative, expressed
Traes_3DL_E6B71D302	2.31424	5.98378	0.0146699	1.56989	up	dupletAD2941	LOC_Os02g15750.1	expressed protein
Traes_6DS_2F7DE1EAB	0.199892	1.52626	0.0148083	3.12375	up	dupletAD3091	LOC_Os01g27490.1	leucoanthocyanidin dioxygenase, putative, expressed
Traes_6DS_6FEF78A19	34.8681	340.366	9.97507e-09	3.46605	up	dupletAD3186	LOC_Os01g41710.1	chlorophyll A-B binding protein, putative, expressed
Traes_7DS_D0996C347	0.00793725	3.37635	0.00126757	8.89711	up	dupletAD3252	LOC_Os06g08023.1	flavonol synthase/flavanone 3-hydroxylase, putative,
Traes_6DL_C44C0B6EF	5.93391	15.5304	0.0376398	1.57862	up	dupletAD4453	LOC_Os07g31884.1	MATE efflux family protein, putative, expressed
Traes_7DS_26341EE29	0	2.12493	0.0210947	Inf	up	dupletAD5620	LOC_Os12g09700.1	Jacalin-like lectin domain containing protein, putative,
Traes_1DL_90B0CF996	124.599	331.743	0.049448	1.59744	up	dupletBD7760	LOC_Os09g17740.1	chlorophyll A-B binding protein, putative, expressed
Traes_2DS_708F03DA3	0.0768408	1.95221	2.37629e-08	4.87126	up	dupletBD8332	LOC_Os07g48030.1	peroxidase precursor, putative, expressed
Traes_2DL_D9637AC56	4.63932	15.7776	0.00412143	1.95664	up	singletonD32459	LOC_Os04g51300.1	peroxidase precursor, putative, expressed
Traes_2DL_E2DA84D05	0.413811	1.45381	0.00495723	2.01265	up	singletonD32514	LOC_Os11g36140.1	receptor-like protein kinase 2 precursor, putative, expressed
Traes_1DS_9696ADD50	4.4419	11.8862	0.0313332	1.61569	up	singletonD32531	LOC_Os01g02800.1	receptor-like kinase ARK1AS, putative, expressed
Traes_5DL_B979F9A05	0.398003	2.55831	0.0117427	2.87511	up	singletonD33008	LOC_Os03g63330.1	aspartokinase, chloroplast precursor, putative, expressed
Traes_7DL_94D5F8AFE	2.97796	7.6473	0.0371235	1.5489	up	singletonD33474	LOC_Os06g50390.1	eukaryotic aspartyl protease domain containing protein,
Traes_3DL_B38DFDDFF	1.04395	5.66077	0.00340245	2.62417	up	singletonD34916	LOC_Os07g44499.1	peroxidase, putative, expressed
Traes_2DL_6336F5E35	0.0620995	1.72552	3.28053e-05	4.95928	up	singletonD35176	LOC_Os03g18850.1	pathogenesis-related Bet v I family protein, putative,
Traes_1DL_430D91CBE	9.75862	62.6131	1.44827e-06	2.85771	up	singletonD35247	LOC_Os09g17740.1	chlorophyll A-B binding protein, putative, expressed
Traes_1DL_510806884	13.6048	37.2957	0.0107391	1.64014	up	singletonD36410	LOC_Os09g17740.1	chlorophyll A-B binding protein, putative, expressed
Traes_6DL_22010EC0B	0.0359383	2.04887	7.16759e-11	6.03252	up	singletonD37871	LOC_Os04g54002.1	serine/threonine-protein kinase receptor precursor,
Traes_1DL_8F7356527	18.3212	66.7946	0.000542628	2.05159	up	singletonD37948	LOC_Os09g17740.1	chlorophyll A-B binding protein, putative, expressed
Traes_3DL_920C6D20E	0.635883	1.64802	0.049448	1.57238	up	singletonD38580	LOC_Os01g42410.1	pleiotropic drug resistance protein, putative, expressed
Traes_7DS_08724E378	0.133765	0.959389	0.00360612	3.04193	up	singletonD39283	LOC_Os08g36630.1	bifunctional monodehydroascorbate reductase and carbonic
Traes_5DS_A281EFAB4	14.8846	64.735	0.000327071	2.30764	up	singletonD39547	LOC_Os12g37260.1	lipoxygenase 2.1, chloroplast precursor, putative,
Traes_6DS_CA5B2D6BC	0.223924	1.21993	0.00345631	2.64269	up	singletonD40309	LOC_Os08g10440.1	NBS-LRR disease resistance protein, putative, expressed
Traes_1DL_84C15D335	10.5666	74.829	9.97507e-09	3.00728	up	singletonD40341	LOC_Os01g41710.1	chlorophyll A-B binding protein, putative, expressed
Traes_4DL_F524BE1D8	1.86466	5.69699	0.0488158	1.79025	up	singletonD41355	LOC_Os03g01270.1	expansin precursor, putative, expressed
Traes_4DL_8AF70D07B	1.28348	4.55819	0.02193	2.02167	up	singletonD41579	LOC_Os10g40460.1	LTPL141 - Protease inhibitor/seed storage/LTP family
Traes_6DS_B8F70E63B	2.70975	9.47959	0.0117441	2.00321	up	singletonD41963	LOC_Os02g01590.1	glycosyl hydrolases, putative, expressed
Traes_5DL_1F44EFC2C	20.4049	137.059	7.63919e-05	2.92489	up	singletonD43431	LOC_Os01g41710.1	chlorophyll A-B binding protein, putative, expressed
Traes_6DS_89CCF9552	38.3319	284.827	5.91611e-07	3.07223	up	singletonD43442	LOC_Os01g41710.1	chlorophyll A-B binding protein, putative, expressed
Traes_1DL_D0033CF8B	2.12415	6.93796	0.0115529	1.91465	up	singletonD43732	LOC_Os10g40600.1	peptide transporter PTR2, putative, expressed
Traes_2DS_CE7A57AB0	2.05382	6.42442	0.00700493	1.8463	up	singletonD44002	LOC_Os12g17910.1	T-complex protein, putative, expressed
Traes_5DL_2D156E093	0.0787944	1.2666	0.000916913	4.21494	up	singletonD44339	LOC_Os07g01710.1	phytosulfokine receptor precursor, putative, expressed
Traes_6DS_298A05A8D	0.103167	2.40425	0.00074271	4.72407	up	singletonD45404	LOC_Os02g02930.1	terpene synthase, putative, expressed
Traes_3DL_531151069	0.167725	1.86871	0.0260091	3.70158	up	singletonD45442	LOC_Os01g70520.1	Os1bglu5 - beta-glucosidase homologue, similar to G. max
Traes_1DL_95936DC50	0.38065	3.35152	4.19699e-07	3.34632	up	singletonD45537	LOC_Os10g39680.1	CHIT14 - Chitinase family protein precursor, expressed
Traes_3DL_7DCAFDAE0	0.368881	2.38361	0.000672557	2.89569	up	singletonD46307	LOC_Os05g25450.1	TKL_IRAK_CrRLK1L-1.3 - The CrRLK1L-1 subfamily has homology
Traes_3DS_323703C0F	0.247791	1.00823	0.0488158	2.24252	up	singletonD46927	LOC_Os04g01310.1	serine/threonine-protein kinase receptor precursor,
Traes_2DL_E1EB3D15A	1.71957	10.0187	2.56578e-05	2.72031	up	singletonD47057	LOC_Os03g18850.1	pathogenesis-related Bet v I family protein, putative,
Traes_5DL_60C61B6C0	65.0961	242.573	0.00175353	2.08336	up	triplet1034	LOC_Os01g41710.1	chlorophyll A-B binding protein, putative, expressed
Traes_4DL_869294621	3.74332	9.21592	0.035543	1.49472	up	triplet1363	LOC_Os01g43390.1	uroporphyrinogen decarboxylase, putative, expressed
Traes_7DS_94B1934E7	0.214357	1.27101	0.000965037	2.76809	up	triplet1730	LOC_Os06g42020.1	CSLA9 - cellulose synthase-like family A, expressed
Traes_2DS_1500B6F52	1.44103	6.16115	0.000590771	2.27991	up	triplet3178	LOC_Os04g05050.1	pectate lyase precursor, putative, expressed
Traes_7DL_D350B7C25	0.857646	2.22171	0.0376398	1.56337	up	triplet3666	LOC_Os06g49450.1	expressed protein
Traes_1DL_263F80870	3.18153	7.7701	0.0298214	1.48308	up	triplet4180	LOC_Os08g06280.7	LSD1 zinc finger domain containing protein, expressed
Traes_1DL_A6553EC96	0.300898	2.53882	0.000473227	3.26486	up	triplet5228	LOC_Os01g04050.1	BBTI12 - Bowman-Birk type bran trypsin inhibitor
Traes_2DS_D55319741	16.0805	39.0926	0.0298214	1.48165	up	triplet5269	LOC_Os07g28610.2	expressed protein
Traes_1DL_3D0C8C358	1.4645	4.43558	0.00437075	1.79891	up	triplet6507	LOC_Os05g49150.1	eukaryotic translation initiation factor 3 subunit D,
Traes_1DL_DDBE5CFA9	42.9468	213.593	4.91347e-05	2.50768	up	triplet6729	LOC_Os01g41710.1	chlorophyll A-B binding protein, putative, expressed
Traes_1DL_89D1676FC	8.7466	25.6021	0.00517305	1.73613	up	triplet7512	LOC_Os05g38680.1	plant-specific domain TIGR01589 family protein, expressed
Traes_3DL_91A183190	1.84446	4.73262	0.0281256	1.56156	up
aSignificance by Benjamini-Hchberg multiple test correction (P < 0.05)
